# Supplementary material for: Unfavorable Dietary Quality Contributes to Elevated Risk of Ischemic Stroke among Residents in Southwest China: Based on the Chinese Diet Balance Index 2016 (DBI-16)
Source: MDPI journal article supplement (doi:10.3390/nu14030694), 2022-02-07
Supplement: s1 [file s1]

**Table S1 DBI-16 components and standard for scoring<sup>1</sup>**

| Component                            | Score                                | Subgroup                             | Score                                | Intake range by energy intake level  |                                      |                                      |                                      |                                      |                 |                      |                 |                      |            |            |  |  |
|--------------------------------------|--------------------------------------|--------------------------------------|--------------------------------------|--------------------------------------|--------------------------------------|--------------------------------------|--------------------------------------|--------------------------------------|-----------------|----------------------|-----------------|----------------------|------------|------------|--|--|
|                                      |                                      |                                      |                                      | 1000 kcal                            | 1200 kcal                            | 1400 kcal                            | 1600 kcal                            | 1800 kcal                            | 2000 kcal       | 2200 kcal            | 2400 kcal       | 2600 kcal            | 2800 kcal  | 3000 kcal  |  |  |
| C1-Cereal                            | (-12)-12                             | Cereal                               | (-12)-12                             | 0g=-12                               | <15g=-12                             | 0g=-12                               | <10g=-12                             | <35g=-12                             | <5g=-12         | <30g=-12             | 0g=-12          | <50g=-12             | <75g=-12   | <100g=-12  |  |  |
|                                      |                                      |                                      |                                      | 75-95g=0                             | 90-110g=0                            | 125-175g=0                           | 175-225g=0                           | 200-250g=0                           | 225-275g=0      | 250-300g=0           | 275-325g=0      | 325-375g=0           | 350-400g=0 | 375-425g=0 |  |  |
|                                      |                                      |                                      |                                      | >170g=12                             | >185g=12                             | >250g=12                             | >390g=12                             | >415g=12                             | >495g=12        | >520g=12             | >600g=12        | >650g=12             | >675g=12   | >700g=12   |  |  |
| C2-Vegetable and fruit               | (-12)-0                              | Vegetable                            | (-6)-0                               | ≥200g=0                              | ≥250g=0                              | ≥3000g=0                             | ≥400g=0                              | ≥450g=0                              | ≥500g=0         |                      |                 | ≥600g=0              |            |            |  |  |
|                                      |                                      |                                      |                                      | 160-199g=-1                          | 200-249g=-1                          | 240-299g=-1                          | 320-399g=-1                          | 360-449g=-1                          | 400-499g=-1     |                      | 480-599g=-1     |                      |            |            |  |  |
|                                      |                                      |                                      |                                      | Score decreased 1 with intake amount | Score decreased 1 with intake amount | Score decreased 1 with intake amount | Score decreased 1 with intake amount | Score decreased 1 with intake amount |                 |                      | Score decreased |                      |            |            |  |  |
|                                      |                                      |                                      |                                      | 1 with intake amount                 | 1 with intake amount                 | amount decreased 60g                 | 1 with intake amount                 | amount decreased 90g                 | decreased 1000g |                      |                 | 1 with intake amount |            |            |  |  |
|                                      |                                      |                                      |                                      | decreased 40g                        | decreased 50g                        | 0g=-6                                | amount                               | 0g=-6                                | 0g=-6           |                      |                 | amount               |            |            |  |  |
|                                      |                                      |                                      |                                      | decreased 40g                        | decreased 50g                        |                                      | decreased 80g                        |                                      |                 |                      |                 | decreased 1200g      |            |            |  |  |
|                                      |                                      |                                      |                                      | 0g=-6                                | 0g=-6                                |                                      | 0g=-6                                |                                      |                 |                      |                 | 0g=-6                |            |            |  |  |
|                                      |                                      | Fruit                                | (-6)-0                               | ≥150g=0; 120-149g=-1                 |                                      | ≥2000g=0; 160-199g=-1                |                                      | ≥300g=0; 240-299g=-1                 |                 | ≥350g=0; 280-349g=-1 |                 | ≥400g=0; 320-399g=-1 |            |            |  |  |
| Score decreased 1 with intake amount | Score decreased 1 with intake amount | Score decreased 1 with intake amount | Score decreased 1 with intake amount | Score decreased 1 with intake amount | Score decreased 1 with intake amount | Score decreased 1 with intake amount | Score decreased 1 with intake amount |                                      |                 |                      |                 |                      |            |            |  |  |
| 0g=-6                                | 0g=-6                                | 0g=-6                                | 0g=-6                                | 0g=-6                                | 0g=-6                                | 0g=-6                                | 0g=-6                                |                                      |                 |                      |                 |                      |            |            |  |  |
| C3-Milk and dairy products           | (-12)-0                              | Dairy                                | (-6)-0                               | ≥500g=0                              |                                      | ≥350g=0                              | ≥300g=0                              |                                      |                 |                      |                 |                      |            |            |  |  |
|                                      |                                      |                                      |                                      | Score decreased 1 with intake amount |                                      | Score decreased 1 with intake amount | Score decreased 1 with intake amount |                                      |                 |                      |                 |                      |            |            |  |  |
|                                      |                                      |                                      |                                      | decreased 100g                       |                                      | 1 with intake                        | 0g=-6                                |                                      |                 |                      |                 |                      |            |            |  |  |
|                                      |                                      |                                      |                                      | 0g=-6                                |                                      | amount                               |                                      |                                      |                 |                      |                 |                      |            |            |  |  |
|                                      |                                      |                                      |                                      |                                      |                                      | decreased 70g                        |                                      |                                      |                 |                      |                 |                      |            |            |  |  |
|                                      |                                      |                                      |                                      | 0g=-6                                |                                      |                                      |                                      |                                      |                 |                      |                 |                      |            |            |  |  |
| Soybean and soybean products         | Soybean                              | (-6)-0                               | ≥5g=0                                | ≥15g=0                               |                                      | ≥25g=0                               |                                      |                                      |                 |                      |                 |                      |            |            |  |  |

|                   |                    |                                                      |           | Score decreased<br>1 with intake<br>amount<br>decreased 1g<br>0g=-6 | Score decreased 1 with intake amount decreased 3g<br>0g=-6 |           |           |            | Score decreased 1 with intake amount decreased 5g<br>0g=-6 |  |
|-------------------|--------------------|------------------------------------------------------|-----------|---------------------------------------------------------------------|------------------------------------------------------------|-----------|-----------|------------|------------------------------------------------------------|--|
| C4-Animal<br>food | (-12)-8            | Red meat and<br>products,<br><br>Poultry and<br>game | (-4)-4    | 0g=-3                                                               | 0g=-4                                                      | 0g=-4     | 0g=-4     | 0g=-4      | 0g=-4                                                      |  |
|                   |                    |                                                      |           | 1-5g=-2                                                             | 1-5g=-3                                                    | 1-10g=-3  | 1-15g=-3  | 1-20g=-3   | 1-25g=-3                                                   |  |
|                   |                    |                                                      |           | 6-10g=-1                                                            | 6-10g=-2                                                   | 11-20g=-2 | 16-30g=-2 | 21-40g=-2  | 26-50g=-2                                                  |  |
|                   |                    |                                                      |           | 11-20g=0                                                            | 11-15g=-1                                                  | 21-30g=-1 | 31-45g=-1 | 41-60g=-3  | 51-75g=-1                                                  |  |
|                   |                    |                                                      |           | 21-25g=1                                                            | 16-35g=0                                                   | 31-50g=0  | 46-55g=0  | 61-90g=0   | 76-125g=0                                                  |  |
|                   |                    |                                                      |           | 26-30g=2                                                            | 36-40g=1                                                   | 51-60g=1  | 56-70g=1  | 91-110g=1  | 126-150g=1                                                 |  |
|                   |                    |                                                      |           | 31-35g=3                                                            | 41-45g=2                                                   | 61-70g=2  | 71-85g=2  | 111-130g=2 | 151-175g=2                                                 |  |
|                   |                    |                                                      |           | >35g=4                                                              | 46-50g=3                                                   | 71-80g=3  | 85-100g=3 | 131-150g=3 | 176-200g=3                                                 |  |
|                   |                    |                                                      |           |                                                                     | >50g =4                                                    | >80g =4   | >100g =4  | >150g=4    | >200g=4                                                    |  |
|                   | Fish and<br>Shrimp | (-4)-0                                               | 0g=-4     | <5g=-4                                                              | <10g=-4                                                    | <5g=-4    | 0g=-4     | <25g=-4    | <50g=-4                                                    |  |
|                   |                    |                                                      | 1-4g=-3   | 5-9g=-3                                                             | 10-19g=-3                                                  | 5-19g=-3  | 1-24g=-3  | 25-49g=-3  | 50-74g=-3                                                  |  |
|                   |                    |                                                      | 5-9g=-2   | 10-14g=-2                                                           | 20-29g=-2                                                  | 20-34g=-2 | 25-49g=-2 | 50-74g=-2  | 75-99g=-2                                                  |  |
|                   |                    |                                                      | 10-14g=-1 | 15-19g=-1                                                           | 30-39g=-1                                                  | 35-49g=-1 | 50-74g=-1 | 75-99g=-1  | 100-124g=-1                                                |  |
|                   |                    |                                                      | ≥15g=0    | ≥20g=0                                                              | ≥40g=0                                                     | ≥50g=0    | ≥75g=0    | ≥100g=0    | ≥125g=0                                                    |  |
|                   | Egg                | (-4)-4                                               | 0g=-4     | <5g=-4                                                              | 0g=-4                                                      | 0g=-4     |           |            |                                                            |  |
|                   |                    |                                                      | 1-5g=-3   | 6-10g=-3                                                            | 1-10g=-3                                                   | 1-15g=-3  |           |            |                                                            |  |
|                   |                    |                                                      | 6-10g=-2  | 11-15g=-2                                                           | 11-20g=-2                                                  | 16-30g=-2 |           |            |                                                            |  |
|                   |                    |                                                      | 11-15g=-1 | 16-20g=-1                                                           | 21-30g=-1                                                  | 31-45g=-1 |           |            |                                                            |  |
|                   |                    |                                                      | 16-25g=0  | 21-30g=0                                                            | 31-50g=0                                                   | 46-55g=0  |           |            |                                                            |  |
|                   |                    |                                                      | 26-30g=1  | 31-35g=1                                                            | 51-60g=1                                                   | 56-70g=1  |           |            |                                                            |  |

|                      |         |                    |         |                                                                                                                                                                                                                                                                                                                                              |                                                   |                                                   |                                                   |          |          |
|----------------------|---------|--------------------|---------|----------------------------------------------------------------------------------------------------------------------------------------------------------------------------------------------------------------------------------------------------------------------------------------------------------------------------------------------|---------------------------------------------------|---------------------------------------------------|---------------------------------------------------|----------|----------|
|                      |         |                    |         | 31-35g=2                                                                                                                                                                                                                                                                                                                                     | 36-40g=2                                          | 61-70g=2                                          | 71-85g=2                                          |          |          |
|                      |         |                    |         | 36-40g=3                                                                                                                                                                                                                                                                                                                                     | 41-45g=3                                          | 71-80g=-3                                         | 85-100g=3                                         |          |          |
|                      |         |                    |         | >40g=4                                                                                                                                                                                                                                                                                                                                       | >45g =4                                           | >80g =4                                           | >100g =4                                          |          |          |
| C5-Empty energy food | 0-12    | Cooking oil        | 0-6     | ≤20g=0                                                                                                                                                                                                                                                                                                                                       | ≤25g=0                                            |                                                   |                                                   | ≤30g=0   | ≤35g=0   |
|                      |         |                    |         | 21-25g=1                                                                                                                                                                                                                                                                                                                                     | 26-30g=1                                          |                                                   |                                                   | 31-35g=1 | 36-40g=1 |
|                      |         |                    |         | >45g=6                                                                                                                                                                                                                                                                                                                                       | >50g=6                                            |                                                   |                                                   | >55g=6   | >60g=6   |
|                      |         | Alcoholic beverage | 0-6     | Male: ≤ 25g=0; 26-40g=1; score increased 1 with intake amount increased 15g; >100g=6<br>(25g alcohol=750ml beer or 250ml wine or 75g liquor 38° or 50g liquor > 38°)<br>Female: ≤15g=0; 16-25g=1; score increased 1 with intake amount increased 10g; >65g=6<br>(15g alcohol=450ml beer or 150ml wine or 50g liquor 38° or 30g liquor > 38°) |                                                   |                                                   |                                                   |          |          |
| C6-Condiments        | 0-12    | Addible sugar      | 0-6     | ≤25g=0; 26g=1; score increased 1 with intake amount increased 5g; >50g=6                                                                                                                                                                                                                                                                     |                                                   |                                                   |                                                   |          |          |
|                      |         | Salt               | 0-6     | <2g=0                                                                                                                                                                                                                                                                                                                                        | <3g=0                                             | <4g=0                                             | <6g=0                                             |          |          |
|                      |         |                    |         | 2-3g=1                                                                                                                                                                                                                                                                                                                                       | 3-4g=1                                            | 4-5g=1                                            | 6-7g=1                                            |          |          |
|                      |         |                    |         | Score increased 1 with intake amount increased 2g                                                                                                                                                                                                                                                                                            | score increased 1 with intake amount increased 2g | Score increased 1 with intake amount increased 2g | score increased 1 with intake amount increased 2g |          |          |
|                      |         |                    |         | amount increased 2g                                                                                                                                                                                                                                                                                                                          | amount increased 2g                               | amount increased 2g                               | amount increased 2g                               |          |          |
|                      |         |                    |         | >12g=6                                                                                                                                                                                                                                                                                                                                       | >13g=6                                            | 14g=6                                             |                                                   |          |          |
| C7-Diet variety      | (-12)-0 | Diet variety       | (-12)-0 | ≥12 kinds of food (soybean is 5g) =0; score decreased 1 with decreased 1 kinds of food                                                                                                                                                                                                                                                       |                                                   |                                                   |                                                   |          |          |
| C8-Drinking water    | (-12)-0 | Drinking water     | (-12)-0 | ≥1200ml=0; score decreased 1 with intake amount decreased 100ml; <100ml=-12                                                                                                                                                                                                                                                                  |                                                   |                                                   |                                                   |          |          |

<sup>1</sup>This table has been reproduced from He, Y., et al., Update of the Chinese diet balance index: DBI-16. Acta Nutrimenta Sinica, 2018. 40(06): p. 526-530.
